# Supplementary material
Source: publisher figshare collection journal article supplement (https://acs.figshare.com/ndownloader/files/4289347)
Supplement: Supplementary file 1 [file 4289347]

# Gas Sensing with Au-Decorated Carbon Nanotubes.

*Zeila Zanolli<sup>1,\*</sup>, Radouane Leghrib<sup>2</sup>, Alexandre Felten<sup>3</sup>, Jean-Jacques Pireaux<sup>3</sup>, Eduard Llobet<sup>2</sup> and  
Jean-Christophe Charlier<sup>1</sup>*

<sup>1</sup> Institute of Condensed Matter and Nanosciences (IMCN), Université catholique de Louvain (UCL),  
Place Croix du Sud 1 (NAPS-ETSF-Boltzmann), 1348 Louvain-la-Neuve, Belgium

<sup>2</sup> MINOS-EMaS Universitat Rovira i Virgili, Avda. Paisos Catalans, 26, 43007 Tarragona, Spain

<sup>3</sup> Facultés Universitaires Notre-Dame de la Paix, Research Centre in Physics of Matter and Radiation  
(PMR), Rue de Bruxelles 61, B-5000 Namur, Belgium

\* To whom correspondence should be addressed. Email: zeilazanolli@gmail.com

**Full response of the sensors to NO<sub>2</sub>.** Full response to NO<sub>2</sub> of sensors based on oxygen-plasma treated MWNTs (Fig. S1, O<sub>2</sub> – MWNTs) and sensors based on MWNTs which, after the oxygen plasma treatment, have been decorated with 5Å Au (Fig. S2, Au(5Å) –MWNTs). The zoom of Fig. S2 on the initial part of the response and final part of the recovery is shown in Fig. S3.

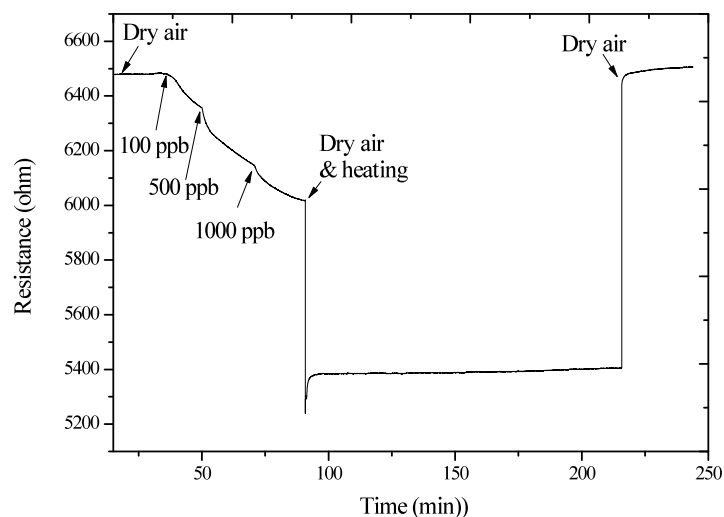

Figure S1. Response towards increasing concentration of  $\text{NO}_2$  (initial part of the sensor response curve) and subsequent baseline recovery (final part of the curve) of an oxygen plasma treated CNT sensor ( $\text{O}_2$  – MWNTs). Baseline recovery consists of flushing the sensor with dry air and heating the active films at  $150^\circ\text{C}$  for promoting desorption of gas molecules. The sensor regains its baseline resistance, once back to room temperature.

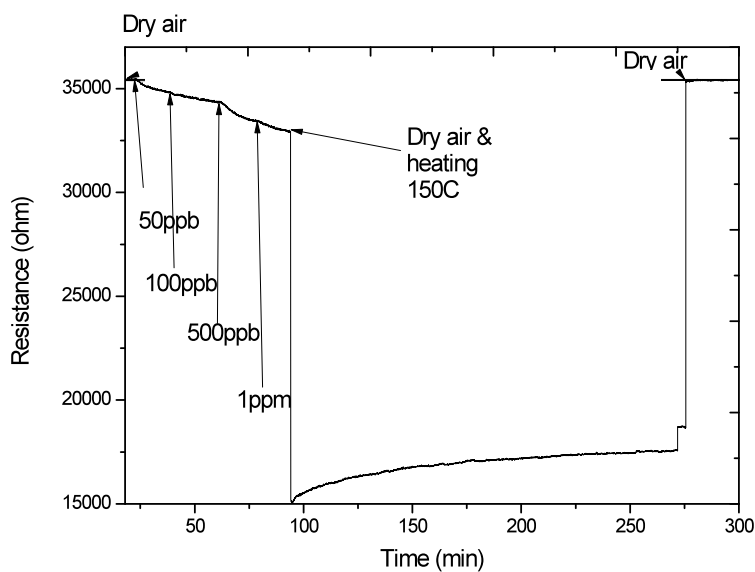

Figure S2. Response towards increasing concentration of  $\text{NO}_2$  (initial part of the sensor response curve) and subsequent baseline recovery (final part of the curve) of a sensor consisting of MWNTs which, after the oxygen plasma treatment, have been decorated with  $5\text{Å}$  Au ( $\text{Au}(5\text{Å})$  – MWNTs). The recovery procedure is described in the caption of Figure S1.

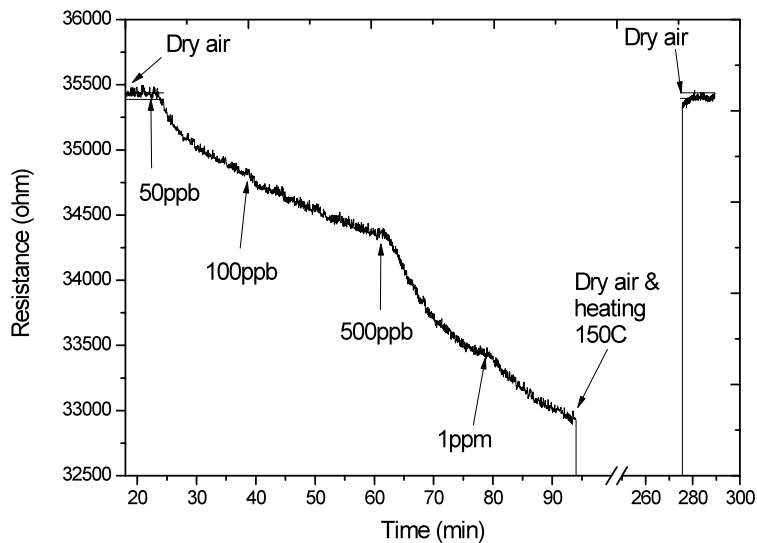

Figure S3. Zoom of Fig. S2 on the initial part of the response and final part of the recovery. Fig, S2 is cut in order to improve readability of the sensor response towards increasing concentration of NO<sub>2</sub>. This figure is analogous to figure 2 of the paper.
